# Supplementary material
Source: MDPI journal article supplement (https://www.mdpi.com/2072-4292/14/16/4007)
Supplement: s1 [file s1]

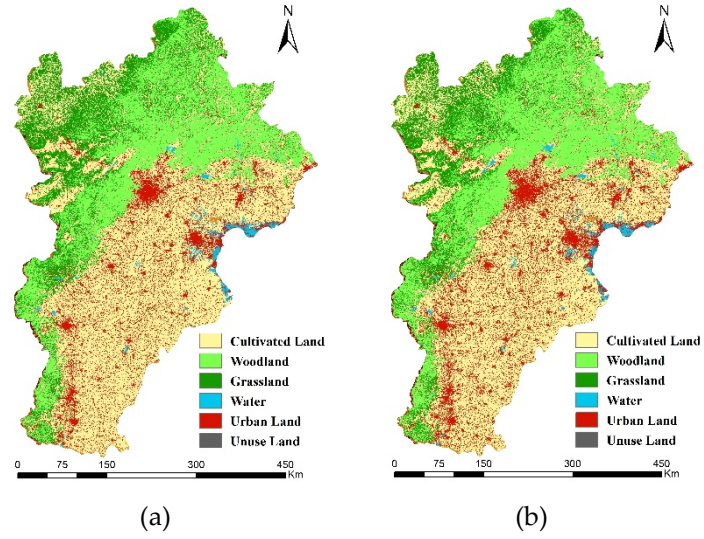

**Figure S1.** Spatial distribution of land use in the Beijing-Tianjin-Hebei region from 2010–2018. (a) 2010; (b) 2018.

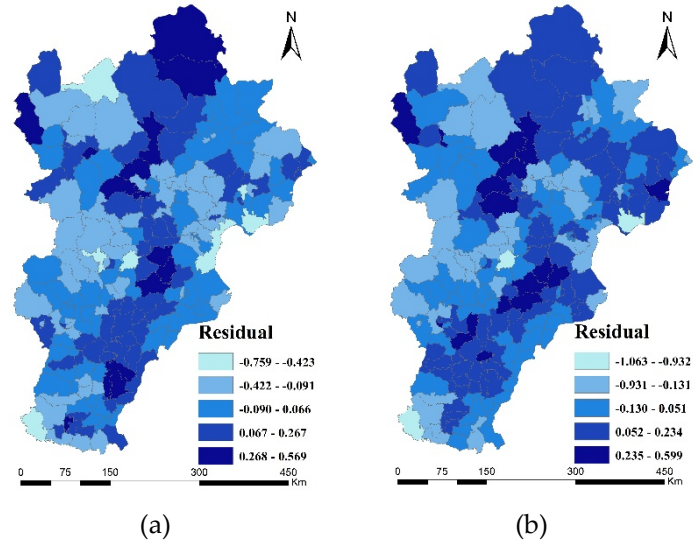

**Figure S2.** Spatial distribution of OLSR model's residual in the Beijing-Tianjin-Hebei region from 2010–2018. (a) 2010; (b) 2018.

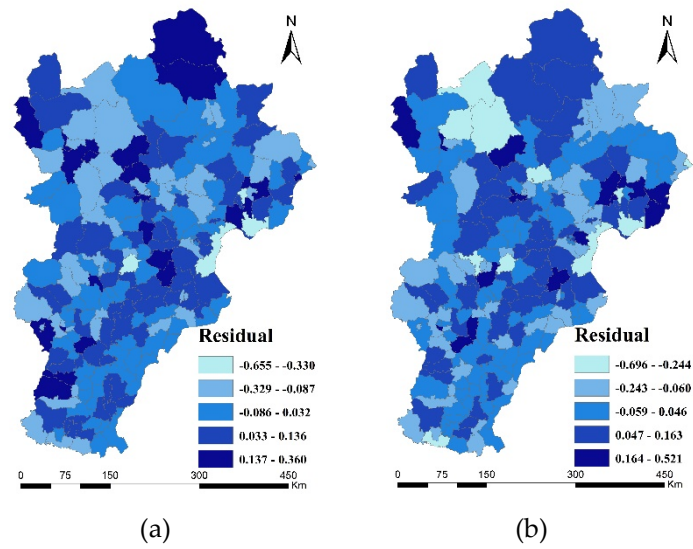

**Figure S3.** Spatial distribution of MGWR model's residual in the Beijing-Tianjin-Hebei region from 2010–2018. (a) 2010; (b) 2018.

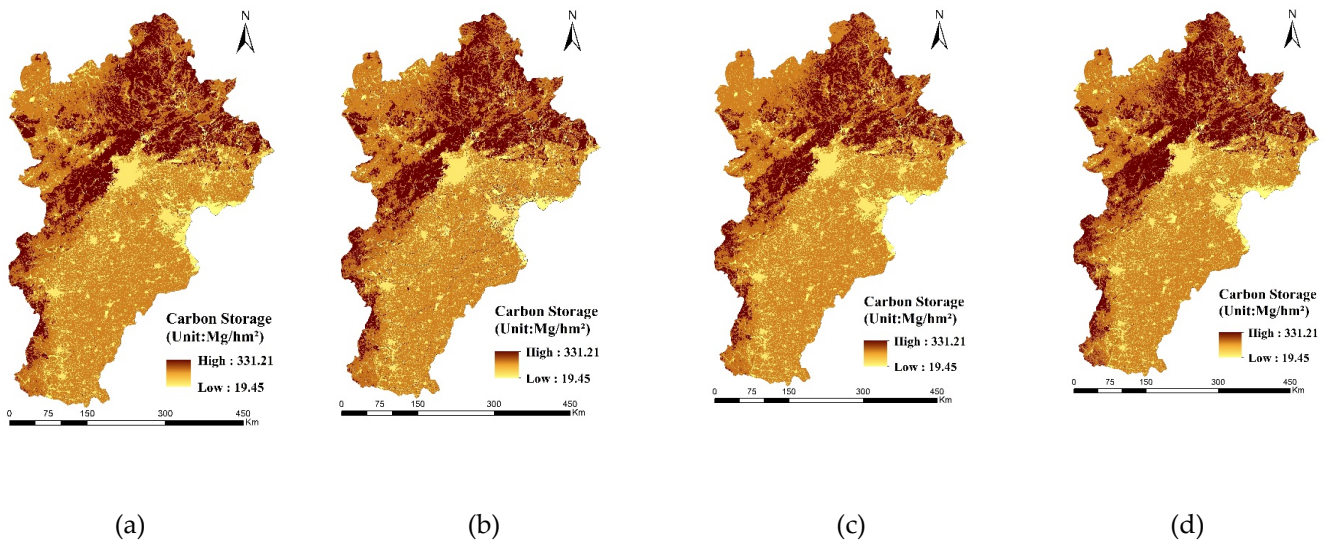

**Figure. S4** Simulation results of carbon storage in 2030 (a): Natural Development; (b): Woodland buffer zone; (c): Agricultural expansion; (d): Forest rehabilitation from slope agriculture

Table. S1 The abbreviations and their definitions for all the figures and tables involved in the paper.

| Abbreviation      | Definition                             |
|-------------------|----------------------------------------|
| BUA               | built-up area                          |
| NTL               | nighttime light                        |
| PD                | population density                     |
| UISA              | impervious surface in urban areas      |
| NDVI              | normalized difference vegetation index |
| PM <sub>2.5</sub> | fine particulate matter                |
| RH                | relative humidity                      |
| DEM               | digital elevation model                |

---

|                  |                                    |
|------------------|------------------------------------|
| WS               | wind speed                         |
| C                | Carbon storage                     |
| AGC              | aboveground carbon                 |
| BGC              | belowground carbon                 |
| SOC              | soil organic carbon                |
| DOC              | dead organic carbon                |
| STD              | standard deviation                 |
| AIC <sub>c</sub> | Akaike information criterion value |
| CHAP             | ChinaHighAirPollutants datasets    |
| SRTM             | Shuttle Radar Topography Mission   |

---
